# Supplementary material for: Feasibility of wireless continuous monitoring of vital signs without using alarms on a general surgical ward: A mixed methods study
Source: PubMed Central journal article supplement (PMC8947816; doi:10.1371/journal.pone.0265435), 2022-03-14

### S5 Appendix: Distribution of answers on the USE questionnaire

|                                                                               | 1       | 2        | 3         | 4         | 5         | 6         | 7        |
|-------------------------------------------------------------------------------|---------|----------|-----------|-----------|-----------|-----------|----------|
| It helps me be more effective.                                                | 0 (0)   | 1 (2.2)  | 10 (21.7) | 14 (30.4) | 12 (26.1) | 6 (13.0)  | 3 (6.5)  |
| It helps me be more productive.                                               | 1 (2.2) | 5 (10.9) | 9 (19.6)  | 17 (37.0) | 10 (21.7) | 4 (8.7)   | 0 (0)    |
| It is useful.                                                                 | 0 (0)   | 0 (0)    | 1 (2.2)   | 7 (15.2)  | 11 (23.9) | 19 (41.3) | 8 (17.4) |
| It gives me more control over the activities in my work.                      | 0 (0)   | 5 (10.9) | 9 (19.6)  | 13 (28.7) | 7 (15.2)  | 10 (21.7) | 2 (4.4)  |
| It makes the things I want to accomplish easier to get done.                  | 0 (0)   | 2 (4.4)  | 11 (23.9) | 13 (28.7) | 12 (26.1) | 6 (13.0)  | 2 (4.4)  |
| It saves me time when I use it.                                               | 1 (2.2) | 5 (10.9) | 13 (28.7) | 13 (28.7) | 8 (17.4)  | 4 (8.7)   | 2 (4.4)  |
| It meets my needs.                                                            | 1 (2.2) | 1 (2.2)  | 5 (10.9)  | 16 (34.8) | 15 (32.6) | 6 (13.0)  | 2 (4.4)  |
| It does everything I would expect it to do.                                   | 1 (2.2) | 3 (6.5)  | 9 (19.6)  | 11 (23.9) | 13 (28.7) | 8 (17.4)  | 1 (2.2)  |
| It is easy to use                                                             | 0 (0)   | 0 (0)    | 1 (2.2)   | 7 (15.2)  | 16 (34.8) | 19 (41.3) | 3 (6.5)  |
| It is simple to use                                                           | 0 (0)   | 0 (0)    | 0 (0)     | 8 (17.4)  | 16 (34.8) | 19 (41.3) | 3 (6.5)  |
| It is user friendly                                                           | 0 (0)   | 1 (2.2)  | 1 (2.2)   | 5 (10.9)  | 16 (34.8) | 20 (43.5) | 3 (6.5)  |
| It requires the fewest steps possible to accomplish what I want to do with it | 0 (0)   | 1 (2.2)  | 4 (8.7)   | 17 (37.0) | 10 (21.7) | 13 (28.7) | 1 (2.2)  |
| It is flexible                                                                | 1 (2.2) | 0 (0)    | 0 (0)     | 15 (32.6) | 13 (28.7) | 16 (34.8) | 1 (2.2)  |
| Using it is effortless                                                        | 2 (4.4) | 1 (2.2)  | 3 (6.5)   | 15 (32.6) | 13 (28.7) | 11 (23.9) | 1 (2.2)  |
| I can use it without written instructions                                     | 2 (4.4) | 8 (17.4) | 16 (34.8) | 3 (6.5)   | 11 (23.9) | 4 (8.7)   | 2 (4.4)  |
| I don't notice any inconsistencies as I use it                                | 0 (0)   | 0 (0)    | 11 (23.9) | 16 (34.8) | 14 (30.4) | 4 (8.7)   | 1 (2.2)  |
| Both occasional and regular users would like it                               | 1 (2.2) | 1 (2.2)  | 4 (8.7)   | 9 (19.6)  | 18 (39.1) | 12 (26.1) | 1 (2.2)  |
| I can recover from mistakes quickly and easily                                | 1 (2.2) | 1 (2.2)  | 5 (10.9)  | 24 (52.2) | 10 (21.7) | 5 (10.9)  | 0 (0)    |
| I can use it successfully every time                                          | 0 (0)   | 2 (4.4)  | 3 (6.5)   | 13 (28.7) | 16 (34.8) | 12 (26.1) | 0 (0)    |
| I learned to use it quickly.                                                  | 0 (0)   | 0 (0)    | 2 (4.4)   | 8 (17.4)  | 17 (37.0) | 13 (28.7) | 6 (13.0) |
| I easily remember how to use it.                                              | 0 (0)   | 0 (0)    | 4 (8.7)   | 7 (15.2)  | 16 (34.8) | 12 (26.1) | 7 (15.2) |
| It is easy to learn to use it.                                                | 0 (0)   | 0 (0)    | 2 (4.4)   | 3 (6.5)   | 16 (34.8) | 20 (43.5) | 5 (10.9) |
| I quickly became skillful with it.                                            | 0 (0)   | 0 (0)    | 2 (4.4)   | 10 (21.7) | 12 (26.1) | 17 (37.0) | 5 (10.9) |
| I am satisfied with it.                                                       | 0 (0)   | 1 (2.2)  | 1 (2.2)   | 11 (23.9) | 18 (39.1) | 12 (26.1) | 3 (6.5)  |
| I would recommend it to a friend.                                             | 0 (0)   | 0 (0)    | 5 (10.9)  | 10 (21.7) | 16 (34.8) | 11 (23.9) | 4 (8.7)  |
| It is fun to use.                                                             | 0 (0)   | 2 (4.4)  | 4 (8.7)   | 6 (13.0)  | 12 (26.1) | 13 (28.3) | 9 (19.6) |
| It works the way I want it to work.                                           | 1 (2.2) | 0 (0)    | 11 (23.9) | 9 (19.6)  | 13 (28.7) | 11 (23.9) | 1 (2.2)  |
| It is wonderful.                                                              | 1 (2.2) | 2 (4.4)  | 4 (8.7)   | 15 (32.6) | 15 (32.6) | 8 (17.4)  | 1 (2.2)  |
| I feel I need to have it.                                                     | 0 (0)   | 3 (6.5)  | 11 (23.9) | 16 (34.8) | 11 (23.9) | 5 (10.9)  | 0 (0)    |
| It is pleasant to use.                                                        | 0 (0)   | 0 (0)    | 3 (6.5)   | 13 (28.7) | 17 (37.0) | 10 (21.7) | 3 (6.5)  |

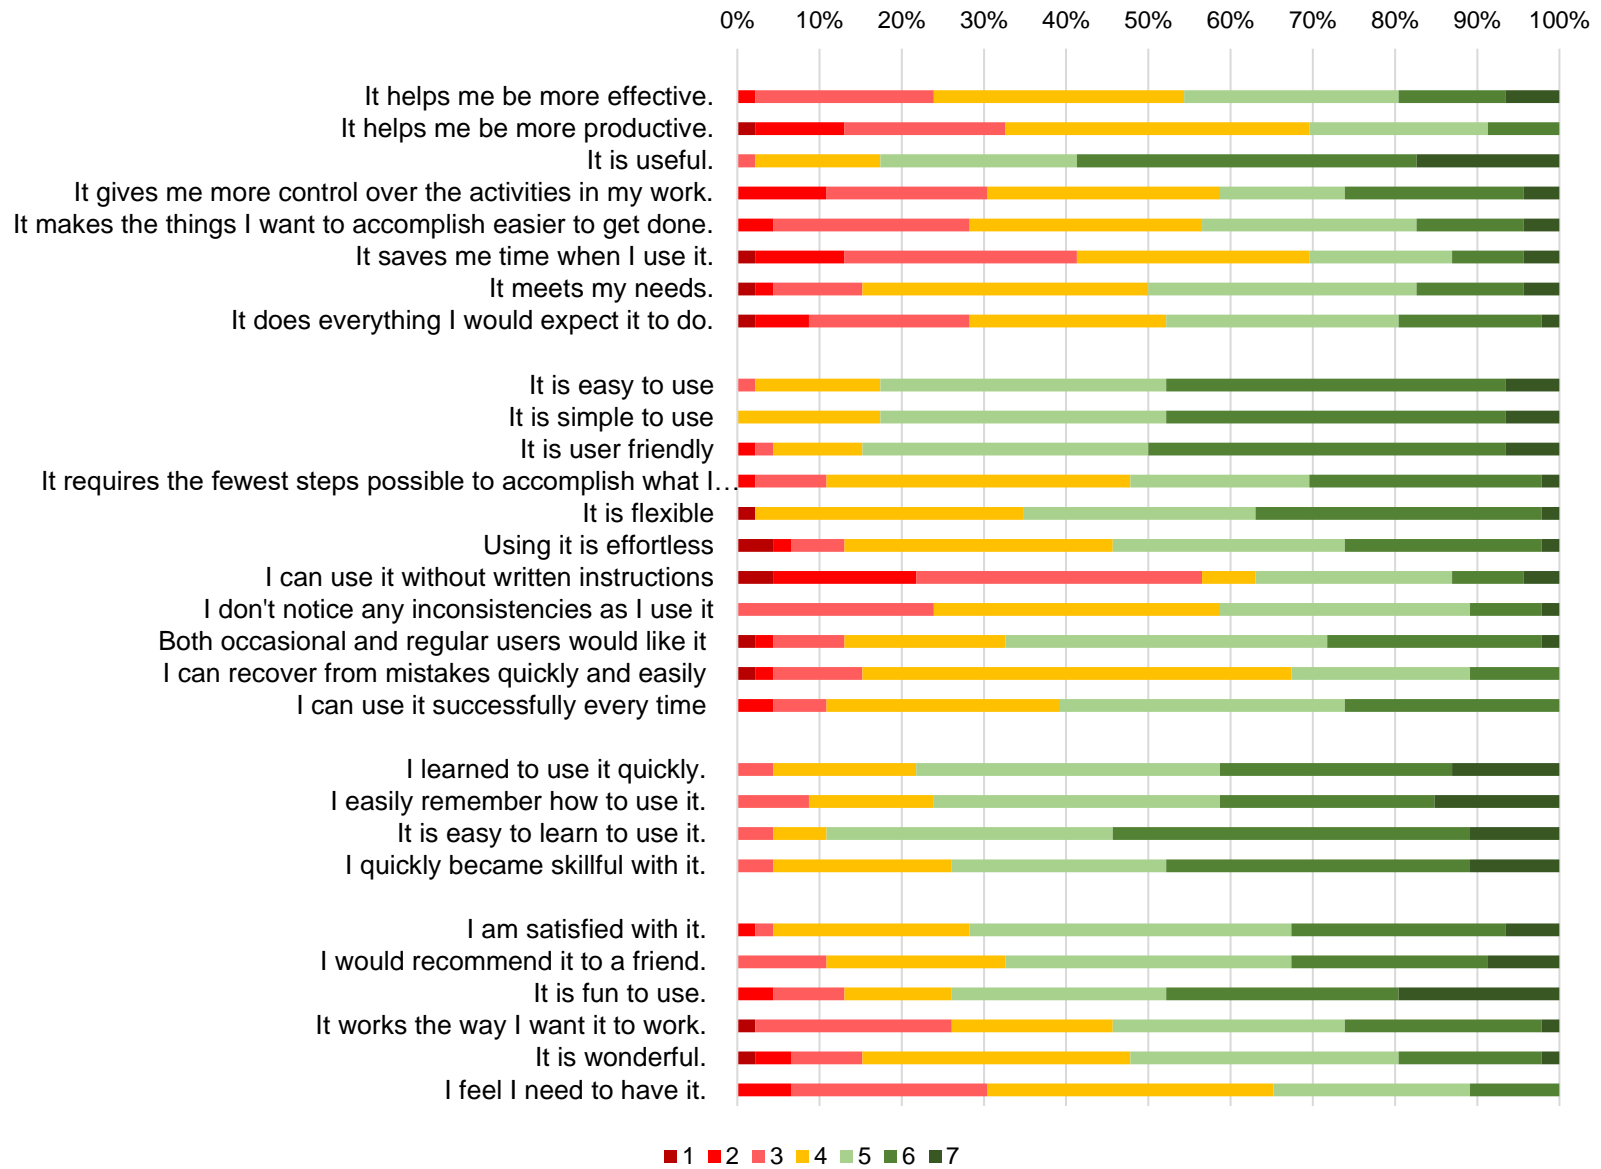

Supplement: pone.0265435.s005.pdf [file pone.0265435.s005.pdf]
