# Supplementary material for: Feasibility of wireless continuous monitoring of vital signs without using alarms on a general surgical ward: A mixed methods study
Source: PubMed Central journal article supplement (PMC8947816; doi:10.1371/journal.pone.0265435), 2022-03-14
Supplement: pone.0265435.s001.pdf [file pone.0265435.s001.pdf]

**S4 Table: Shapiro-Wilk test results for normality**

| Variable name                                                                 | Shapiro Wilk test results |         |
|-------------------------------------------------------------------------------|---------------------------|---------|
|                                                                               | statistic                 | p-value |
| <b>Patient characteristics</b>                                                |                           |         |
| Age in years (median, IQR)                                                    | .944                      | .011*   |
| Body Mass Index (kg/m <sup>2</sup> ) (median, IQR)                            | .954                      | .032*   |
| <b>Healthcare professionals' characteristics (n=46)</b>                       |                           |         |
| Age (median, IQR)                                                             | .824                      | .000*   |
| Work experience (median, IQR)                                                 | .803                      | .000*   |
| <b>USE-questionnaire</b>                                                      |                           |         |
| Usefulness ( $\alpha = .906$ )                                                | .986                      | .855    |
| It helps me be more effective.                                                | .926                      | .006*   |
| It helps me be more productive.                                               | .931                      | .009*   |
| It is useful.                                                                 | .890                      | .000*   |
| It gives me more control over the activities in my work.                      | .927                      | .007*   |
| It makes the things I want to accomplish easier to get done.                  | .933                      | .007*   |
| It saves me time when I use it.                                               | .945                      | .011*   |
| It meets my needs.                                                            | .928                      | .030*   |
| It does everything I would expect it to do.                                   | .943                      | .025*   |
| Ease of use ( $\alpha = .921$ )                                               | .964                      | .169    |
| It is easy to use                                                             | .884                      | .000*   |
| It is simple to use                                                           | .863                      | .000*   |
| It is user friendly                                                           | .856                      | .000*   |
| It requires the fewest steps possible to accomplish what I want to do with it | .902                      | .001*   |
| It is flexible                                                                | .832                      | .000*   |
| Using it is effortless                                                        | .894                      | .001*   |
| I can use it without written instructions                                     | .919                      | .004*   |
| I don't notice any inconsistencies as I use it                                | .889                      | .000*   |
| Both occasional and regular users would like it                               | .889                      | .000*   |
| I can recover from mistakes quickly and easily                                | .867                      | .000*   |
| I can use it successfully every time                                          | .877                      | .000*   |
| Ease of learning ( $\alpha = .842$ )                                          | .968                      | .243    |
| I learned to use it quickly.                                                  | .913                      | .002*   |
| I easily remember how to use it.                                              | .913                      | .002*   |
| It is easy to learn to use it.                                                | .869                      | .000*   |
| I quickly became skillful with it.                                            | .903                      | .001*   |
| Satisfaction ( $\alpha = .917$ )                                              | .981                      | .655    |
| I am satisfied with it.                                                       | .909                      | .002*   |
| I would recommend it to a friend.                                             | .919                      | .003*   |
| It is fun to use.                                                             | .908                      | .001*   |
| It works the way I want it to work.                                           | .911                      | .002*   |
| It is wonderful.                                                              | .921                      | .004*   |
| I feel I need to have it.                                                     | .918                      | .003*   |
| It is pleasant to use.                                                        | .913                      | .002*   |
| <b>Fidelity of the monitoring system</b>                                      |                           |         |
| Median monitoring time (median, IQR)                                          | .751                      | .000*   |
| Total measurements                                                            | .751                      | .000*   |
| D-EWS scores median (IQR)                                                     | .802                      | .000*   |
| D-EWS > 3 median (IQR)                                                        | .581                      | .000*   |
| System notifications median (n, %)                                            | .598                      | .000*   |
| <b>Patient acceptability</b>                                                  |                           |         |
| Comfortable                                                                   | .566                      | .000*   |
| Feeling safe                                                                  | .878                      | .000*   |
| More involved in own health                                                   | .894                      | .001*   |
| More access to healthcare professionals                                       | .895                      | .001*   |

|                                 |      |       |
|---------------------------------|------|-------|
| Recommendation for clinical use | .665 | .000* |
| Recommendation for home use     | .766 | .000* |

**Clinical outcomes**

|                       |      |       |
|-----------------------|------|-------|
| Length of stay (days) | .753 | .000* |
|-----------------------|------|-------|

---
