# Supplementary material for: Feasibility of wireless continuous monitoring of vital signs without using alarms on a general surgical ward: A mixed methods study
Source: PubMed Central journal article supplement (PMC8947816; doi:10.1371/journal.pone.0265435), 2022-03-14
Supplement: pone.0265435.s002.pdf [file pone.0265435.s002.pdf]

**S1 Appendix: Thresholds EWS scores of the continuous monitoring system**

|                         | <b>EWS score</b> |              |               |                |                |                |
|-------------------------|------------------|--------------|---------------|----------------|----------------|----------------|
| <b>Score</b>            | <b>2</b>         | <b>1</b>     | <b>0</b>      | <b>1</b>       | <b>2</b>       | <b>3</b>       |
| <b>Heart rate</b>       | <b>&lt;40</b>    | <b>40-50</b> | <b>51-100</b> | <b>101-110</b> | <b>111-130</b> | <b>&gt;130</b> |
| <b>Respiratory rate</b> | <b>&lt;9</b>     |              | <b>9-14</b>   | <b>15-20</b>   | <b>21-30</b>   | <b>&gt;30</b>  |
