# Supplementary material for: Feasibility of wireless continuous monitoring of vital signs without using alarms on a general surgical ward: A mixed methods study
Source: PubMed Central journal article supplement (PMC8947816; doi:10.1371/journal.pone.0265435), 2022-03-14
Supplement: pone.0265435.s004.pdf [file pone.0265435.s004.pdf]

### S3 Appendix: Topics focus groups

- 1 General introduction and purpose of focus group
  - 2 How did you feel about working with continuous monitoring in general?
  - 3 We see a score of 4.4 out of 7 for usability and usefulness.  
Do you recognize this? Can you explain this score?
  - 4 We see a score of 4.7 out of 7 for ease of use.  
Do you recognize this? Can you explain this score?
  - 5 We see a score of 5.3 out of 7 for ease of learning.  
Do you recognize this? Can you explain this score?
  - 6 We see a score of 4.8 out of 7 for satisfaction.  
Do you recognize this? Can you explain this score?
1. What is the value to you of active alarms during continuous monitoring?

|                  |                |               |
|------------------|----------------|---------------|
|                  | n=46           |               |
| Useful           | <b>4.4±1.0</b> | ★ ★ ★ ★ ☆ ☆ ☆ |
| Ease of use      | <b>4.7±0.8</b> | ★ ★ ★ ★ ★ ☆ ☆ |
| Ease of learning | <b>5.3±1.0</b> | ★ ★ ★ ★ ★ ☆ ☆ |
| Satisfaction     | <b>4.8±1.0</b> | ★ ★ ★ ★ ★ ☆ ☆ |
